# Supplementary material for: The transformation of anatase TiO2 to TiSe2 to form TiO2–TiSe2 composites for Li+/Na+ storage with improved capacities
Source: Royal Society of Chemistry journal article supplement (doi:10.1039/c9ce00133f), 2019-01-01
Supplement: c9ce00133f1.pdf [file c9ce00133f1.pdf]

| Cycle number | Specific capacity (mAh/g) |
|--------------|---------------------------|
| 1            | 745.6444                  |
| 2            | 455.6346                  |
| 3            | 439.0247                  |
| 4            | 428.8881                  |
| 5            | 427.3428                  |
| 6            | 424.5642                  |
| 7            | 421.9857                  |
| 8            | 422.3218                  |
| 9            | 427.5396                  |
| 10           | 424.5759                  |
| 11           | 419.1494                  |
| 12           | 429.5797                  |
| 13           | 432.2964                  |
| 14           | 431.3699                  |
| 15           | 433.1125                  |
| 16           | 435.9626                  |
| 17           | 437.305                   |
| 18           | 443.1734                  |
| 19           | 443.9193                  |
| 20           | 445.944                   |
| 21           | 446.6353                  |
| 22           | 446.5591                  |
| 23           | 450.1457                  |
| 24           | 451.5857                  |
| 25           | 453.7534                  |
| 26           | 458.2924                  |
| 27           | 457.9663                  |
| 28           | 448.2612                  |
| 29           | 438.3312                  |
| 30           | 439.0229                  |
| 31           | 437.5086                  |
| 32           | 436.5398                  |
| 33           | 437.6893                  |
| 34           | 438.7936                  |
| 35           | 441.733                   |
| 36           | 439.7231                  |
| 37           | 445.0929                  |
| 38           | 447.7477                  |
| 39           | 450.489                   |
| 40           | 453.42                    |
| 41           | 442.7752                  |
| 42           | 435.5509                  |
| 43           | 428.921                   |

|    |          |
|----|----------|
| 44 | 414.5113 |
| 45 | 407.0898 |
| 46 | 405.5841 |
| 47 | 405.7332 |
| 48 | 406.2225 |
| 49 | 413.1018 |
| 50 | 404.7361 |
| 51 | 430.3157 |
| 52 | 427.4557 |
| 53 | 428.3792 |
| 54 | 430.8122 |
| 55 | 433.2727 |
| 56 | 432.2836 |
| 57 | 435.8404 |
| 58 | 431.4237 |
| 59 | 435.3906 |
| 60 | 434.6449 |
| 61 | 434.7329 |
| 62 | 437.1064 |
| 63 | 443.9886 |
| 64 | 442.3688 |
| 65 | 441.3274 |
| 66 | 442.3954 |
| 67 | 443.8525 |
| 68 | 445.8805 |
| 69 | 444.2746 |
| 70 | 444.2839 |
| 71 | 443.51   |
| 72 | 443.8801 |
| 73 | 443.3913 |
| 74 | 445.6194 |
| 75 | 445.6581 |
| 76 | 445.6915 |
| 77 | 446.2645 |
| 78 | 450.3961 |
| 79 | 453.463  |
| 80 | 447.0367 |
| 81 | 457.3069 |
| 82 | 449.3877 |
| 83 | 450.2535 |
| 84 | 460.493  |
| 85 | 457.6048 |
| 86 | 463.334  |
| 87 | 466.2326 |

|     |          |
|-----|----------|
| 88  | 461.7489 |
| 89  | 458.2265 |
| 90  | 457.8955 |
| 91  | 456.6843 |
| 92  | 456.9239 |
| 93  | 451.8336 |
| 94  | 454.613  |
| 95  | 458.9729 |
| 96  | 458.0624 |
| 97  | 459.2048 |
| 98  | 456.0911 |
| 99  | 451.5169 |
| 100 | 450.6778 |
| 101 | 446.6137 |
| 102 | 446.4967 |
| 103 | 447.9814 |
| 104 | 449.7709 |
| 105 | 451.9402 |
| 106 | 450.4321 |
| 107 | 451.156  |
| 108 | 455.9089 |
| 109 | 450.2757 |
| 110 | 459.335  |
| 111 | 461.7143 |
| 112 | 466.5714 |
| 113 | 475.2741 |
| 114 | 475.5369 |
| 115 | 470.835  |
| 116 | 464.7873 |
| 117 | 460.6965 |
| 118 | 458.8012 |
| 119 | 459.472  |
| 120 | 453.5064 |
| 121 | 454.7409 |
| 122 | 457.8585 |
| 123 | 466.1794 |
| 124 | 462.9584 |
| 125 | 461.6011 |
| 126 | 466.6272 |
| 127 | 470.7565 |
| 128 | 470.1698 |
| 129 | 468.3564 |
| 130 | 465.9285 |
| 131 | 460.6094 |

|     |          |
|-----|----------|
| 132 | 459.6587 |
| 133 | 453.8071 |
| 134 | 450.1668 |
| 135 | 451.2339 |
| 136 | 459.3635 |
| 137 | 458.6827 |
| 138 | 454.8572 |
| 139 | 460.5569 |
| 140 | 460.2574 |
| 141 | 462.7598 |
| 142 | 463.9343 |
| 143 | 461.4362 |
| 144 | 467.5809 |
| 145 | 466.8282 |
| 146 | 469.2381 |
| 147 | 477.8645 |
| 148 | 480.088  |
| 149 | 486.9944 |
| 150 | 490.3836 |
| 151 | 486.9159 |
| 152 | 486.8273 |
| 153 | 483.3091 |
| 154 | 480.9229 |
| 155 | 481.1368 |
| 156 | 483.424  |
| 157 | 485.3809 |
| 158 | 476.4792 |
| 159 | 467.3463 |
| 160 | 461.2523 |
| 161 | 454.9231 |
| 162 | 452.5287 |
| 163 | 455.4178 |
| 164 | 452.0552 |
| 165 | 452.6788 |
| 166 | 451.6678 |
| 167 | 453.8747 |
| 168 | 455.6    |
| 169 | 456.3313 |
| 170 | 459.2905 |
| 171 | 468.7126 |
| 172 | 468.0917 |
| 173 | 466.834  |
| 174 | 462.2613 |
| 175 | 460.8695 |

|     |          |
|-----|----------|
| 176 | 460.4778 |
| 177 | 454.8189 |
| 178 | 460.087  |
| 179 | 459.6844 |
| 180 | 471.6328 |
| 181 | 476.6433 |
| 182 | 477.7007 |
| 183 | 480.727  |
| 184 | 477.2054 |
| 185 | 472.2623 |
| 186 | 448.7941 |
| 187 | 450.6668 |
| 188 | 455.7179 |
| 189 | 459.4465 |
| 190 | 465.2485 |
| 191 | 467.3174 |
| 192 | 468.4878 |
| 193 | 469.6084 |
| 194 | 467.6685 |
| 195 | 467.8887 |
| 196 | 467.9174 |
| 197 | 472.9045 |
| 198 | 465.4643 |
| 199 | 467.8882 |
| 200 | 473.9122 |
