# Supplementary material for: The transformation of anatase TiO2 to TiSe2 to form TiO2–TiSe2 composites for Li+/Na+ storage with improved capacities
Source: Royal Society of Chemistry journal article supplement (doi:10.1039/c9ce00133f), 2019-01-01
Supplement: c9ce00133f2.pdf [file c9ce00133f2.pdf]

## Supporting information

**The transformation of anatase TiO<sub>2</sub> to TiSe<sub>2</sub> to form TiO<sub>2</sub>-TiSe<sub>2</sub> composites for  
Li<sup>+</sup>/Na<sup>+</sup> storage with improved capacities**

Pengchao Li, Changmiao Chen, Zhao Huang, Yong Cai and Ming Zhang\* .

Key Laboratory for Micro/Nano Optoelectronic Devices of Ministry of Education &  
Hunan Provincial Key Laboratory of Low-Dimensional Structural Physics and  
Devices, School of Physics and Electronics, Hunan University, Changsha 410082.

\*Email: zhangming@hnu.edu.cn

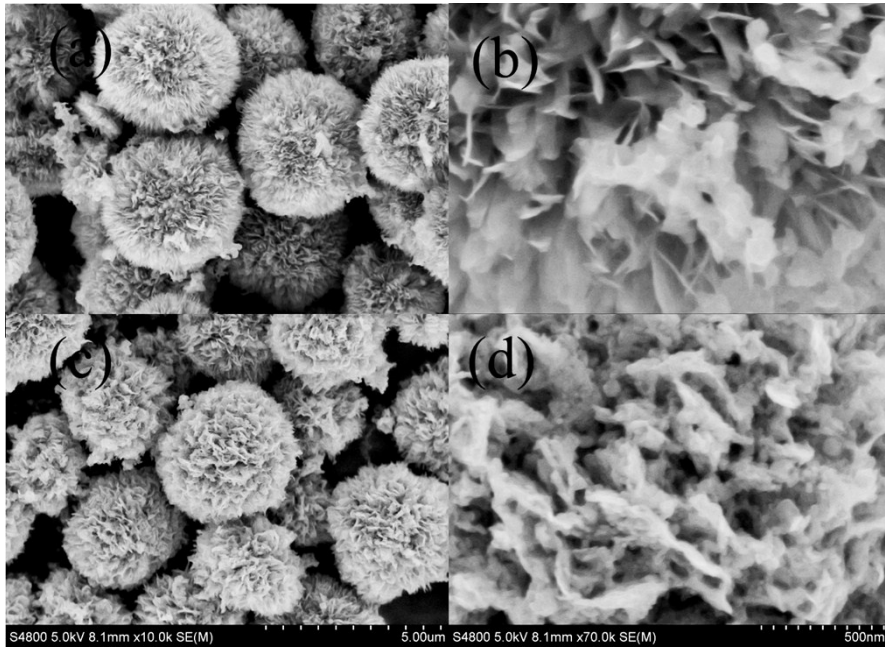

Figure S1. The SEM of  $\text{TiO}_2\text{-A}$ . a-b) pure  $\text{TiO}_2\text{-A}$ ; c-d)  $\text{TiO}_2\text{-A (Se)}$ .

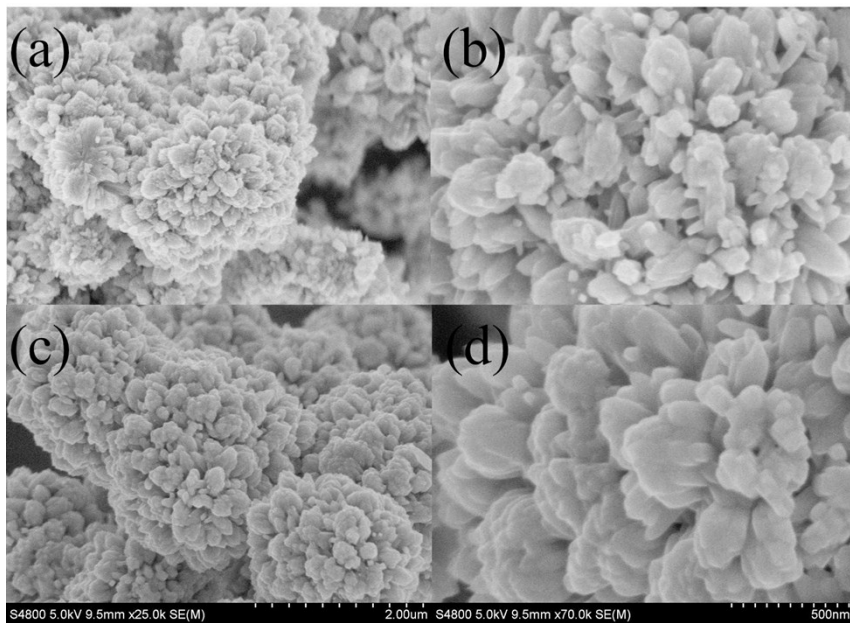

Figure S2. The SEM of  $\text{TiO}_2\text{-R}$ . a-b) pure  $\text{TiO}_2\text{-R}$ ; c-d)  $\text{TiO}_2\text{-R (Se)}$ .

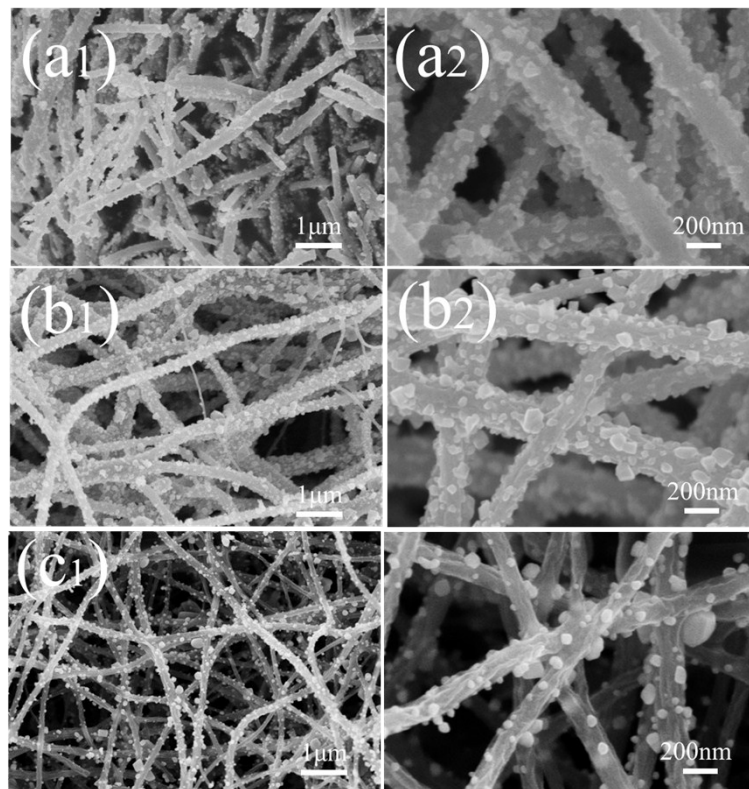

**Figure S3.** The SEM image of  $\text{TiO}_2@\text{CNFs}$  and selenium powder (at a mass ratio of 1:3) are mixed to selenylation at different temperatures. a1-a2)  $\text{TiO}_2\text{-TiSe}_2\text{-CNFs-400-3h}$ ; b1-b2)  $\text{TiO}_2\text{-TiSe}_2\text{-CNFs-500-3h}$ ; c1-c2)  $\text{TiO}_2\text{-TiSe}_2\text{-CNFs-700-3h}$ .

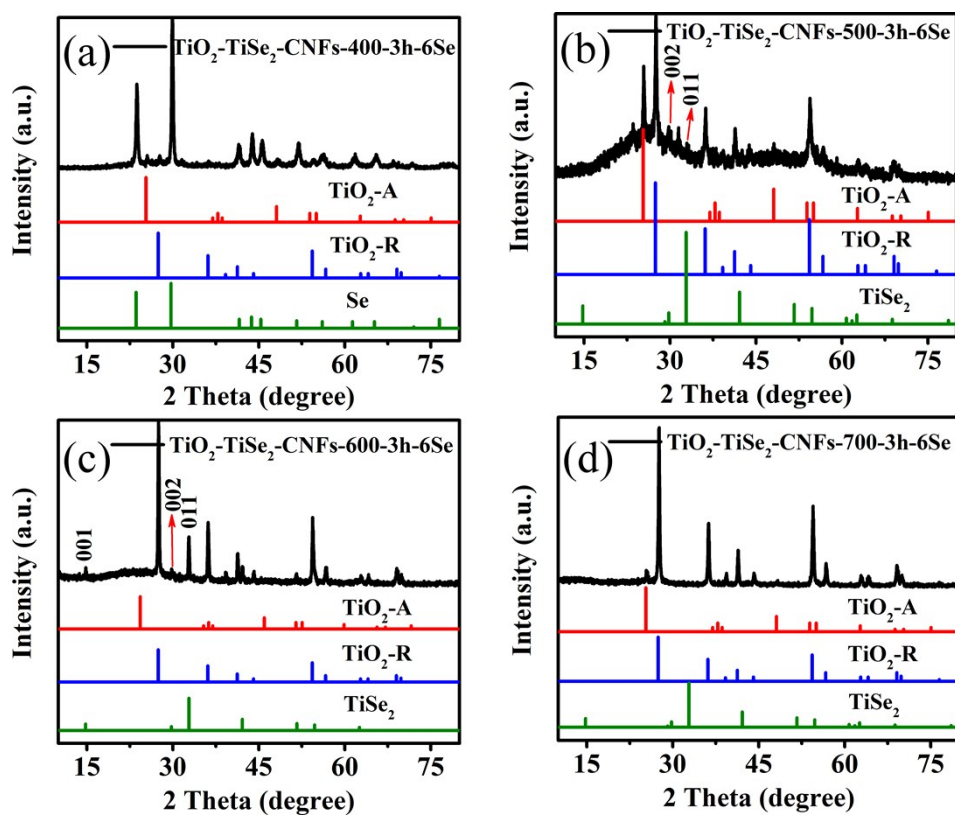

Figure S4. XRD pattern of TiO<sub>2</sub>-TiSe<sub>2</sub>-CNFs. The TiO<sub>2</sub>-CNFs are mixed with selenium Powder (weight ratio=1:6) and selenylation at different temperatures. a) TiO<sub>2</sub>-TiSe<sub>2</sub>-CNFs-400-3h-6Se; b) TiO<sub>2</sub>-TiSe<sub>2</sub>-CNFs-500-3h-6Se; c) TiO<sub>2</sub>-TiSe<sub>2</sub>-CNFs-600-3h-6Se; d) TiO<sub>2</sub>-TiSe<sub>2</sub>-CNFs-700-3h-6Se.

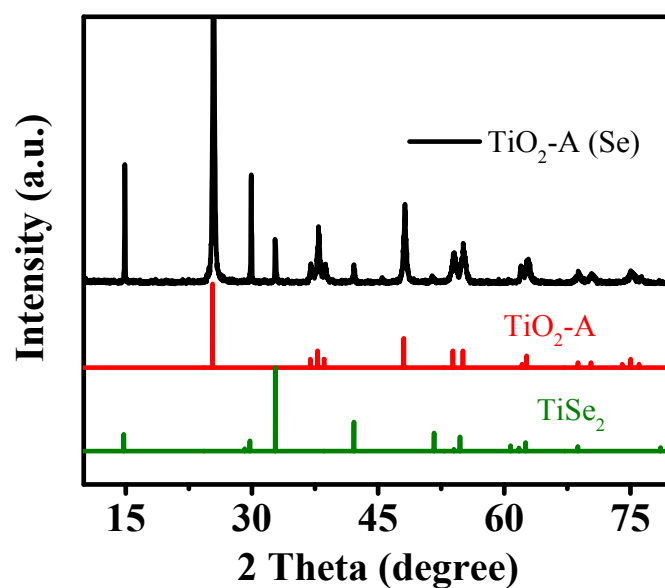

**Figure S5.** XRD patterns of  $\text{TiO}_2\text{-A (Se)}$ . The  $\text{TiO}_2\text{-A (Se)}$  is obtained by annealing  $\text{TiO}_2\text{-A}$  at  $400^\circ\text{C}$  under  $\text{Ar}/\text{H}_2$  atmosphere, and then the  $\text{TiO}_2\text{-A}$  is selenide ( $\text{TiO}_2\text{-A}$ : selenium powder = 1:6, weight ratio) at  $600^\circ\text{C}$  with  $\text{Ar}/\text{H}_2$ .

**Table S1.** The Average size of the  $\text{TiO}_2\text{-A}$ ,  $\text{TiO}_2\text{-R}$  and  $\text{TiSe}_2$  crystallites

| Samples                                         | $\text{TiO}_2\text{-A}$ (nm) | $\text{TiO}_2\text{-R}$ (nm) | $\text{TiSe}_2$ (nm) |
|-------------------------------------------------|------------------------------|------------------------------|----------------------|
| $\text{TiO}_2\text{-CNFs}$                      | 8.43                         | /                            | /                    |
| $\text{TiO}_2\text{-TiSe}_2\text{-CNFs-400-3h}$ | 19.99                        | 17.62                        | 42.44                |
| $\text{TiO}_2\text{-TiSe}_2\text{-CNFs-500-3h}$ | 30.15                        | 26.18                        | 45.51                |
| $\text{TiO}_2\text{-TiSe}_2\text{-CNFs-600-3h}$ | 32.74                        | 36.27                        | 48.75                |

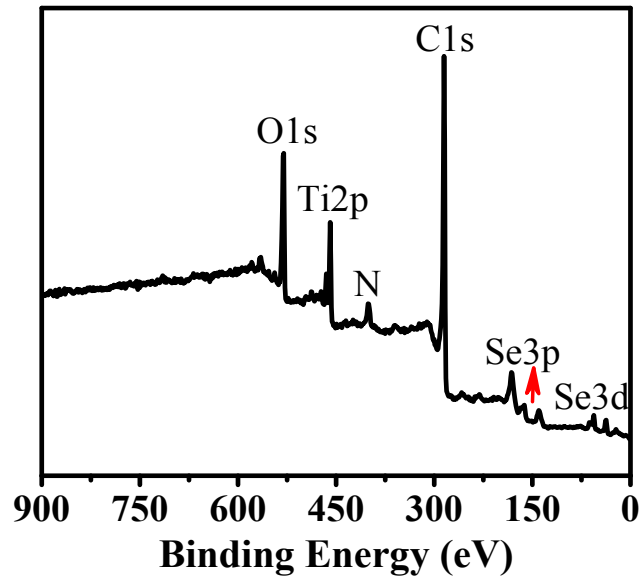

Figure S6. XPS patterns of TiO<sub>2</sub>-TiSe<sub>2</sub>-CNFs-600 compound.

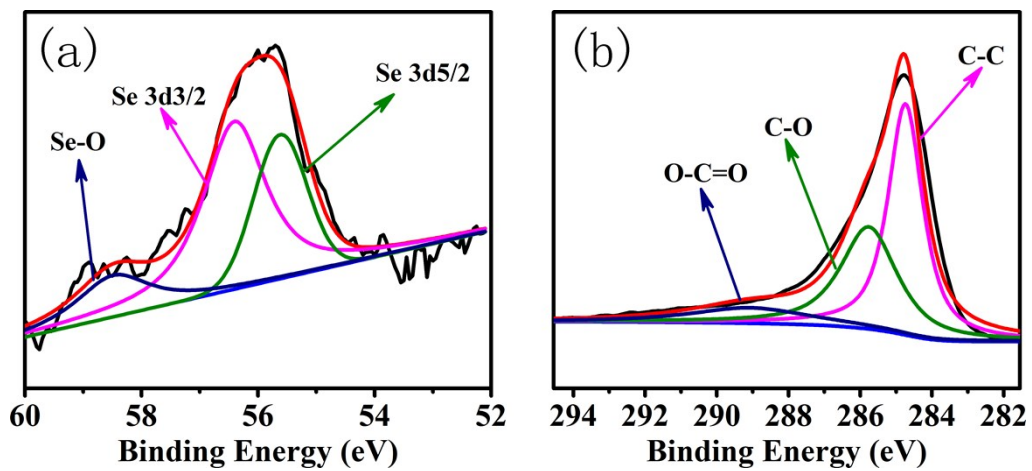

Figure S7. XPS spectra of the Se-CNFs of (a) Se 3d and (b) C 1s XPS spectrum.

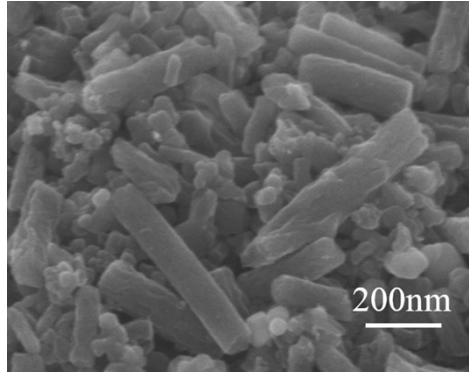

Figure S8. The SEM image of  $\text{TiO}_2\text{-TiSe}_2\text{-CNFs-600-3h}$  after 200 cycles as LIBs.

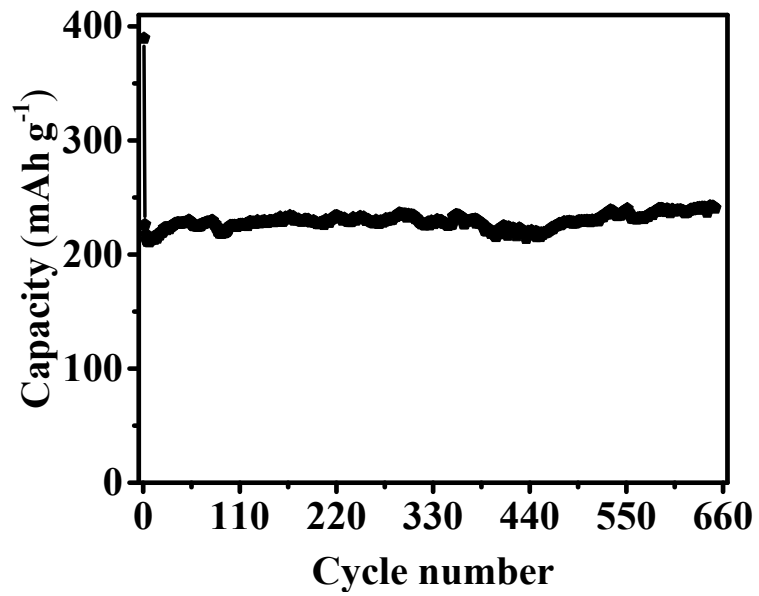

Figure S9. The cycling capacity of  $\text{TiO}_2\text{-TiSe}_2\text{-CNFs}$  as SIBs at  $0.1 \text{ A g}^{-1}$ .

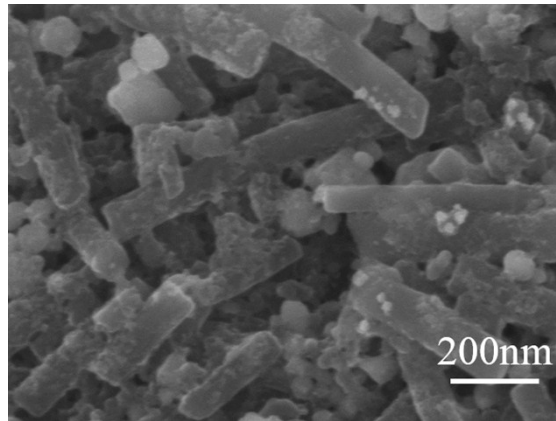

Figure S10. The SEM image of TiO<sub>2</sub>-TiSe<sub>2</sub>-CNFs-600-3h after 200 cycles as SIBs.

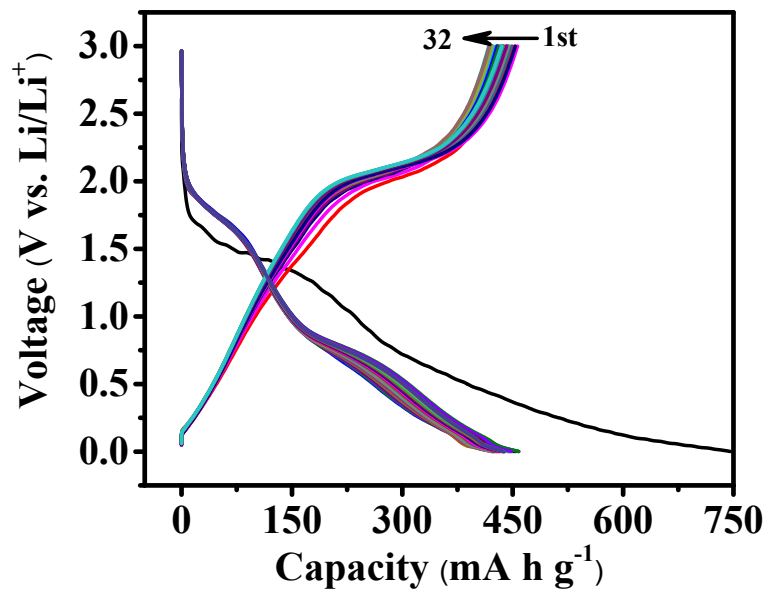



**Figure S11. Charging and discharging curves of TiO<sub>2</sub>-TiSe<sub>2</sub>-CNFs composite as LIBs at the current density of 100 mA/g.**

**Table S2. The electrochemical performances of reported TiO<sub>2</sub> and TiSe<sub>2</sub> for LIBs and SIBs.**

| Materials                                                 | First discharge capacity/<br>current density | capacity (mA h/g)<br>number/current<br>density (A/g) | Rate capacity (mA h/g) /<br>current density (A/g)    | reference    |
|-----------------------------------------------------------|----------------------------------------------|------------------------------------------------------|------------------------------------------------------|--------------|
| Porous anatase TiO <sub>2</sub>                           | /                                            | 166.2/500/0.168<br>106.5/500/0.84                    | /                                                    | 1            |
| Nanoporous Anatase<br>TiO <sub>2</sub>                    | 204/0.17                                     | 151.9/60/0.17 A/g                                    | 164.9/0.17; 151.7/0.34                               | 2            |
| Anatase TiO <sub>2</sub> Nanotubes                        | 297/0.025                                    | 235/ 30/0.025                                        | 205/1.25; 180/2.5                                    | 3            |
| Mesoporous Anatase<br>TiO <sub>2</sub>                    | 332/16.8                                     | 200/100/168                                          | /                                                    | 4            |
| Nanospheres/Graphene<br>Anatase/graphene oxide            | 506/0.168                                    | 148/ 500/0.168                                       | /                                                    | 5            |
| S-doped TiSe <sub>2</sub> /Fe <sub>3</sub> O <sub>4</sub> | 1150.6/ 0.1                                  | 707.4/100/ 0.1<br>432.3/ 200/2                       | 739.8/0.1; 671.8/0.2;<br>623.6/0.5;565.3 /1; 495.4/2 | 6            |
| TiSe <sub>2</sub> nanosheets                              | /                                            | 150/500/0.3<br>115/ 500/ 0.5                         | 150/0.1; 140/0.2, 136/0.5;<br>131/1;125/2            | 7            |
| TiO <sub>2</sub> -TiSe <sub>2</sub> -CNFs-LIBs            | 746/0.1                                      | 470/200/ 0.1                                         | 421/0.1;308/0.2;235/0.5;193/1                        | This<br>work |
| TiO <sub>2</sub> -TiSe <sub>2</sub> -CNFs-SIBs            | 389.7/0.1                                    | 230/600/0.1                                          | 189/0.1;165/0.2;145/0.5;<br>128/1                    | This<br>work |

## Reference

1. Z. Wang, X. Li, H. Xu, Y. Yang, Y. Cui, H. Pan, Z. Wang, B. Chen and G. Qian, *Journal of Materials Chemistry A*, 2014, **2**, 12571-12575.
2. J. Ye, W. Liu, J. Cai, S. Chen, X. Zhao, H. Zhou and L. Qi, *Journal of the American Chemical Society*, 2011, **133**, 933-940.
3. J. Kim and J. Cho, *Journal of the Electrochemical Society*, 2007, **154**, A542-A546.
4. N. Li, G. Liu, C. Zhen, F. Li, L. Zhang and H. M. Cheng, *Advanced Functional Materials*, 2011, **21**, 1717-1722.
5. J. H. Kirn, W. Choi, H.-G. Jung, S. H. Oh, K. Y. Chung, W. I. Cho, I. H. Oh and I. W. Nah, *Journal of Alloys and Compounds*, 2017, **690**, 390-396.
6. J. Yang, Y. Zhang, Y. Zhang, J. Shao, H. Geng, Y. Zhang, Y. Zheng, M. Ulaganathan, Z. Dai and B. Li, *Small*, 2017, **13**.
7. D. Zhang, G. Zhao, P. Li, Y. Zhang, W. Qiu, J. Shu, Y. Jiang, S. X. Dou and W. Sun, *Chemistry-A European Journal*, 2017.
